# Supplementary material
Source: PubMed Central journal article supplement (PMC8887694)
Supplement: NIHMS1776223-supplement-1.pdf [file NIHMS1776223-supplement-1.pdf]

**Supplementary Table 1: Cohort characteristics and Standardized Mean Difference**

| Variable                                         | Level | N   | Overall<br>N=324 | Primary Repair<br>N=131 | Staged Repair<br>N=193 | p                | Unadjusted<br>SMD | Adjusted<br>SMD |
|--------------------------------------------------|-------|-----|------------------|-------------------------|------------------------|------------------|-------------------|-----------------|
| Center                                           | 1     | 324 | 17 (5.25%)       | 11 (8.40%)              | 6 (3.11%)              | <b>&lt;0.001</b> | 0.886             | 0.043           |
|                                                  | 2     |     | 105 (32.41%)     | 68 (51.91%)             | 37 (19.17%)            |                  |                   |                 |
|                                                  | 3     |     | 49 (15.12%)      | 16 (12.21%)             | 33 (17.10%)            |                  |                   |                 |
|                                                  | 4     |     | 22 (6.79%)       | 5 (3.82%)               | 17 (8.81%)             |                  |                   |                 |
|                                                  | 5     |     | 74 (22.84%)      | 22 (16.79%)             | 52 (26.94%)            |                  |                   |                 |
|                                                  | 6     |     | 57 (17.59%)      | 9 (6.87%)               | 48 (24.87%)            |                  |                   |                 |
| Pre-intervention<br>invasive ventilation         | No    | 324 | 252 (77.78%)     | 112 (85.50%)            | 140 (72.54%)           | <b>0.006</b>     | 0.322             | 0.022           |
|                                                  | Yes   |     | 72 (22.22%)      | 19 (14.50%)             | 53 (27.46%)            |                  |                   |                 |
| Prematurity                                      | No    | 324 | 254 (78.40%)     | 109 (83.21%)            | 145 (75.13%)           | 0.08             | 0.200             | 0.033           |
|                                                  | Yes   |     | 70 (21.60%)      | 22 (16.79%)             | 48 (24.87%)            |                  |                   |                 |
| 22q11.2 microdeletion<br>syndrome                | No    | 324 | 288 (88.89%)     | 121 (92.37%)            | 167 (86.53%)           | 0.10             | 0.191             | 0.013           |
|                                                  | Yes   |     | 36 (11.11%)      | 10 (7.63%)              | 26 (13.47%)            |                  |                   |                 |
| Presence of<br>antegrade pulmonary<br>blood flow | No    | 324 | 166 (51.23%)     | 63 (48.09%)             | 103 (53.37%)           | 0.35             | -0.106            | 0.002           |
|                                                  | Yes   |     | 158 (48.77%)     | 68 (51.91%)             | 90 (46.63%)            |                  |                   |                 |

**Abbreviations: SMD standardized mean difference**

**Supplementary Table 2: Clinical Outcomes**

|                                                        | <b>Primary Repair<br/>(n=131)</b> | <b>Staged Repair<br/>(n=193)</b> | <b>p</b> |
|--------------------------------------------------------|-----------------------------------|----------------------------------|----------|
| <b>Mortality</b>                                       |                                   |                                  |          |
| <i>Through 3 months</i>                                | 5% (6)                            | 1% (1)                           | 0.02     |
| <i>Through 18 months</i>                               | 7% (9)                            | 4% (7)                           | 0.19     |
| <b>Procedural complications</b>                        |                                   |                                  |          |
| <i>Total</i>                                           | 47% (61)                          | 37% (72)                         | 0.10     |
| <i>During hospitalization for first procedure</i>      | 47% (61)                          | 20% (39)                         | <0.001   |
| <i>During hospitalization for operative correction</i> | 47% (61)                          | 25% (48)                         | <0.001   |
| <b>Reintervention</b>                                  |                                   |                                  |          |
| <i>Total</i>                                           | 11% (15)                          | 17% (33)                         | 0.20     |
| <i>During hospitalization for first procedure</i>      | 11% (15)                          | 13% (25)                         | 0.73     |
| <i>During hospitalization for operative correction</i> | 11% (15)                          | 6% (12)                          | 0.10     |
| <b>Extracorporeal membrane oxygenation</b>             |                                   |                                  |          |
| <i>Total</i>                                           | 6% (8)                            | 1% (1)                           | 0.004    |
| <i>During hospitalization for first procedure</i>      | 6% (8)                            | 0% (0)                           | 0.001    |
| <i>During hospitalization for operative correction</i> | 6% (8)                            | 1% (1)                           | 0.004    |
| <b>Ventilation (days)</b>                              |                                   |                                  |          |
| <i>Total</i>                                           | 3 (1-8)                           | 4 (2-8)                          | 0.14     |
| <i>During hospitalization for first procedure</i>      | 3 (1-8)                           | 2 (1-4)                          | <0.001   |
| <i>During hospitalization for operative correction</i> | 3 (1-8)                           | 1 (1-3)                          | <0.001   |
| <b>Hospital length of stay (days)</b>                  |                                   |                                  |          |
| <i>Total</i>                                           | 21 (14-35)                        | 32.5 (22-49)                     | <0.001   |
| <i>During hospitalization for first procedure</i>      | 21 (14-35)                        | 20 (12-31)                       | 0.62     |
| <i>During hospitalization for operative correction</i> | 21 (14-35)                        | 9 (6-18)                         | <0.001   |
| <b>Intensive care unit length of stay (days)</b>       |                                   |                                  |          |
| <i>Total</i>                                           | 8 (5-18)                          | 12 (8-19.5)                      | <0.001   |
| <i>During hospitalization for first procedure</i>      | 8 (5-18)                          | 6 (4-11)                         | 0.002    |
| <i>During hospitalization for operative correction</i> | 8 (5-18)                          | 4 (3-7)                          | <0.001   |

Data are presented as % (n) for categorical data and median (interquartile range) for continuous data  
 Abbreviations: ECMO extracorporeal membrane oxygenation
